# Supplementary material
Source: publisher site journal article supplement (https://www.e-cmh.org/upload/media/cmh-2022-0316-Supplementary-Fig-16.pdf)
Supplement: Supplementary file 1 [file cmh-2022-0316-Supplementary-Fig-16.pdf]

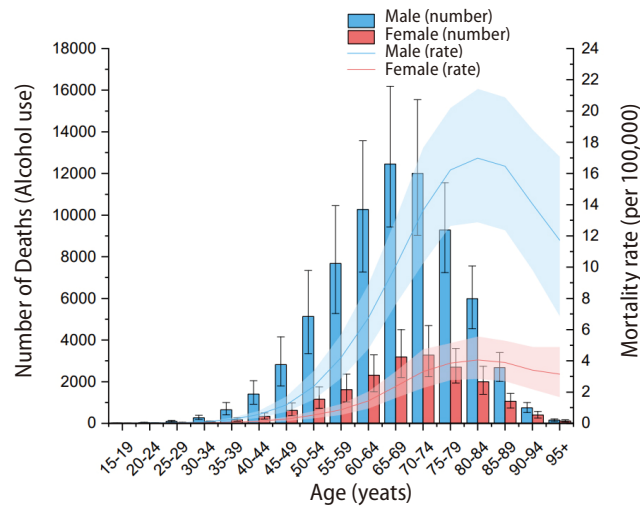

**Supplementary Figure 16.** Number and mortality rates of liver cancer due to alcohol consumption at the global level in 2019.
